# Supplementary material for: Clinical Implications of Platelet Reactivity after Antiplatelet Initiation in Patients with Acute Ischaemic Stroke
Source: Research Square preprint supplement (doi:10.21203/rs.3.rs-5201060/v1), 2025-05-06
Supplement: Supplementary file 1 [file c36cccf165b555a2063e4472.docx]

Table S1. Number of patients initially prescribed aspirin in the Emergency Department, ASPItest performed on Days 1 and 3, and reasons for discrepancies.

| **Initial Aspirin given** | **ASPItest D1** | **ASPItest D3** | **ASPItest Both D1 and D3** | **Reasons** |
| --- | --- | --- | --- | --- |
| 189 | 189 | 183 | 183 | - **3 patients** were **switched from aspirin to clopidogrel**; hence, ASPItest was not performed on Day 3. - **2 patients** had **aspirin discontinued** due to haemorrhagic transformation, hence ASPItest was not performed on Day 3. - **1 patient** was **transferred to another hospital** on Day 2, hence ASPItest was not possible on Day 3. |

Table S2. Number of patients initially prescribed clopidogrel in the Emergency Department, ADPtest performed on Days 1 and 3, and reasons for discrepancies.

| **Initial Clopidogrel given** | **ADPtest D1** | **ADPtest D3** | **ADPtest Both D1 and D3** | **Reasons** |
| --- | --- | --- | --- | --- |
| 104 | 103 | 100 | 100 | - **3 patients** were **switched from DAPT to aspirin monotherapy**, hence ADPtest was not done on Day 3. - **1 patient on DAPT was missed for ADPtest** on both Day 1 and Day 3. |

Table S3. Comparison of platelet reactivity and HOTPR status between antiplatelet therapy regimen given after stroke.

| **Platelet function test** | **Aspirin only** | **Clopidogrel only** | **DAPT** | ***p*-value** |
| --- | --- | --- | --- | --- |
| **ASPItest - Day 1** | | | | |
| n | 94 | NA | 95 |  |
| Value | 24.0 (15.0) | NA | 22.5 (15.3) | 0.421 |
| HOTPR, >30 U | 22 (23.4) | NA | 14 (14.7) | 0.183 |
| **ASPItest - Day 3** | | | | |
| n | 89 | NA | 95 |  |
| Value | 21.4 (8.6) | NA | 18.3 (9.0) | **0.018** |
| HOTPR, >30 U | 7 (8.0) | NA | 4 (5.3) | 0.663 |
| **ADPtest - Day 1** | | | | |
| n | NA | 9 | 94 |  |
| Value | NA | 46.3 (22.1) | 50.6 (21.6) | 0.560 |
| HOTPR, >46 U | NA | 4 (44.4) | 48 (51.1) | 0.976 |
| **ADPtest - Day 3** | | | | |
| n | NA | 9 | 91 |  |
| Value | NA | 37.2 (22.1) | 37.6 (17.7) | 0.954 |
| HOTPR, >46 U | NA | 2 (22.2) | 26 (28.6) | 0.988 |

U, unit; NA, not applicable. Platelet reactivity values are presented as mean (standard deviation). High on-treatment platelet reactivity status is presented as count (percentage).
