# Supplementary material for: Clinical Implications of Platelet Reactivity after Antiplatelet Initiation in Patients with Acute Ischaemic Stroke
Source: Research Square preprint supplement (doi:10.21203/rs.3.rs-5201060/v1), 2025-05-06
Supplement: Supplementary file 2 [file f189693ba2a3ee546a351ceb.docx]

| **Model** | **Outcome** | **Model Type** | **Variable Type** | **Variable** | **HR/OR (95% CI)** | **P-value** |
| --- | --- | --- | --- | --- | --- | --- |
| adp_d1 | Death | Cox | Covariate | age | 0.97 (0.92, 1.02) | 0.24918 |
| Death | Cox | Covariate | daptYES | 0.83 (0.08, 9.03) | 0.87947 |
| Death | Cox | Covariate | initial.nihss | 0.84 (0.53, 1.33) | 0.46346 |
| Death | Cox | Covariate | prior.apltYES | 1.86 (0.39, 8.91) | 0.44011 |
| Death | Cox | Covariate | prior.strokeYES | 1.86 (0.35, 9.76) | 0.46506 |
| Death | Cox | Covariate | sexMale | 0.89 (0.25, 3.24) | 0.86243 |
| Death | Cox | Primary | adp_d1 | 1.01 (0.99, 1.04) | 0.27289 |
| adp_d1_htpr | Death | Cox | Covariate | age | 0.97 (0.92, 1.02) | 0.28271 |
| Death | Cox | Covariate | daptYES | 0.81 (0.07, 8.96) | 0.86465 |
| Death | Cox | Covariate | initial.nihss | 0.86 (0.55, 1.33) | 0.49347 |
| Death | Cox | Covariate | prior.apltYES | 1.97 (0.42, 9.23) | 0.38695 |
| Death | Cox | Covariate | prior.strokeYES | 2.03 (0.41, 10.19) | 0.38722 |
| Death | Cox | Covariate | sexMale | 0.80 (0.22, 2.87) | 0.73482 |
| Death | Cox | Primary | adp_htpr_d1_>46U | 1.93 (0.53, 7.01) | 0.31538 |
| adp_d1d3_changes | Death | Cox | Covariate | age | 0.98 (0.93, 1.04) | 0.53704 |
| Death | Cox | Covariate | daptYES | 0.25 (0.02, 3.88) | 0.31974 |
| Death | Cox | Covariate | initial.nihss | 0.80 (0.51, 1.25) | 0.32518 |
| Death | Cox | Covariate | prior.apltYES | 1.27 (0.24, 6.57) | 0.77881 |
| Death | Cox | Covariate | prior.strokeYES | 2.52 (0.45, 14.08) | 0.29288 |
| Death | Cox | Covariate | sexMale | 0.72 (0.19, 2.75) | 0.62721 |
| Death | Cox | Primary | adp_htpr_chgd1 <=46, d3 >46 | 6.28 (0.73, 53.94) | 0.09383 |
| Death | Cox | Primary | adp_htpr_chgd1 > 46, d3 <=46 | 4.28 (0.73, 25.26) | 0.10798 |
| Death | Cox | Primary | adp_htpr_chgd1 and d3 > 46 | 1.98 (0.26, 15.36) | 0.51140 |
| adp_d3 | Death | Cox | Covariate | age | 0.96 (0.91, 1.02) | 0.17242 |
| Death | Cox | Covariate | daptYES | 0.68 (0.07, 7.18) | 0.75137 |
| Death | Cox | Covariate | initial.nihss | 0.84 (0.53, 1.33) | 0.45532 |
| Death | Cox | Covariate | prior.apltYES | 1.49 (0.29, 7.72) | 0.63509 |
| Death | Cox | Covariate | prior.strokeYES | 1.68 (0.29, 9.71) | 0.56265 |
| Death | Cox | Covariate | sexMale | 0.93 (0.25, 3.54) | 0.92039 |
| Death | Cox | Primary | adp_d3 | 1.02 (0.99, 1.05) | 0.11100 |
| adp_d3_htpr | Death | Cox | Covariate | age | 0.97 (0.92, 1.02) | 0.28069 |
| Death | Cox | Covariate | daptYES | 0.63 (0.05, 7.48) | 0.71785 |
| Death | Cox | Covariate | initial.nihss | 0.85 (0.55, 1.32) | 0.47651 |
| Death | Cox | Covariate | prior.apltYES | 1.53 (0.32, 7.25) | 0.59349 |
| Death | Cox | Covariate | prior.strokeYES | 1.97 (0.38, 10.11) | 0.41819 |
| Death | Cox | Covariate | sexMale | 0.82 (0.22, 3.02) | 0.76231 |
| Death | Cox | Primary | adp_htpr_d3_>46U | 1.48 (0.40, 5.48) | 0.55527 |
| aspi_d1 | Death | Cox | Covariate | age | 1.00 (0.96, 1.04) | 0.82884 |
| Death | Cox | Covariate | daptYES | 1.42 (0.44, 4.64) | 0.56073 |
| Death | Cox | Covariate | initial.nihss | 0.99 (0.89, 1.11) | 0.92170 |
| Death | Cox | Covariate | prior.apltYES | 1.39 (0.39, 5.04) | 0.61210 |
| Death | Cox | Covariate | prior.strokeYES | 1.63 (0.38, 6.89) | 0.50986 |
| Death | Cox | Covariate | sexMale | 0.79 (0.29, 2.11) | 0.63211 |
| Death | Cox | Primary | aspi_d1 | 1.01 (0.99, 1.04) | 0.25556 |
| aspi_d1_htpr | Death | Cox | Covariate | age | 0.99 (0.96, 1.03) | 0.75482 |
| Death | Cox | Covariate | daptYES | 1.46 (0.45, 4.77) | 0.53026 |
| Death | Cox | Covariate | initial.nihss | 1.00 (0.89, 1.12) | 0.93751 |
| Death | Cox | Covariate | prior.apltYES | 1.34 (0.38, 4.78) | 0.64807 |
| Death | Cox | Covariate | prior.strokeYES | 1.63 (0.39, 6.81) | 0.50595 |
| Death | Cox | Covariate | sexMale | 0.76 (0.28, 2.02) | 0.57679 |
| Death | Cox | Primary | aspi_htpr_d1_>30U | 1.48 (0.48, 4.63) | 0.49625 |
| aspi_d1d3_changes | Death | Cox (Firth) | Covariate | age | 1.00 (0.96, 1.04) | 0.88173 |
| Death | Cox (Firth) | Covariate | daptYES | 1.75 (0.53, 6.51) | 0.37000 |
| Death | Cox (Firth) | Covariate | initial.nihss | 1.04 (0.89, 1.18) | NA |
| Death | Cox (Firth) | Covariate | prior.apltYES | 1.57 (0.41, 4.91) | 0.48427 |
| Death | Cox (Firth) | Covariate | prior.strokeYES | 1.68 (0.39, 5.89) | 0.45713 |
| Death | Cox (Firth) | Covariate | sexMale | 0.70 (0.26, 1.94) | 0.48569 |
| Death | Cox (Firth) | Primary | aspi_htpr_chgd1 <30, d3 >30 | 0.79 (0.01, 6.57) | 0.87079 |
| Death | Cox (Firth) | Primary | aspi_htpr_chgd1 >30, d3 <=30 | 1.20 (0.30, 3.63) | 0.76798 |
| Death | Cox (Firth) | Primary | aspi_htpr_chgd1 and d3 >30 | 6.20 (0.62, 32.08) | 0.10379 |
| aspi_d3 | Death | Cox | Covariate | age | 1.00 (0.96, 1.04) | 0.87902 |
| Death | Cox | Covariate | daptYES | 1.62 (0.46, 5.63) | 0.44992 |
| Death | Cox | Covariate | initial.nihss | 1.02 (0.89, 1.17) | 0.74067 |
| Death | Cox | Covariate | prior.apltYES | 1.50 (0.42, 5.34) | 0.53238 |
| Death | Cox | Covariate | prior.strokeYES | 1.56 (0.39, 6.29) | 0.53254 |
| Death | Cox | Covariate | sexMale | 0.69 (0.25, 1.90) | 0.46837 |
| Death | Cox | Primary | aspi_d3 | 1.01 (0.96, 1.06) | 0.63920 |
| aspi_d3_htpr | Death | Cox | Covariate | age | 1.00 (0.96, 1.04) | 0.86662 |
| Death | Cox | Covariate | daptYES | 1.58 (0.46, 5.46) | 0.46912 |
| Death | Cox | Covariate | initial.nihss | 1.03 (0.89, 1.18) | 0.72287 |
| Death | Cox | Covariate | prior.apltYES | 1.47 (0.42, 5.22) | 0.54773 |
| Death | Cox | Covariate | prior.strokeYES | 1.57 (0.39, 6.32) | 0.52754 |
| Death | Cox | Covariate | sexMale | 0.71 (0.26, 1.96) | 0.51061 |
| Death | Cox | Primary | aspi_htpr_d3_>30U | 1.21 (0.15, 9.89) | 0.85892 |
| adp_d1 | END | Logistic | Covariate | age | 1.06 (0.98, 1.16) | 0.16395 |
| END | Logistic | Covariate | daptYES | 0.14 (0.01, 3.45) | 0.15616 |
| END | Logistic | Covariate | initial.nihss | 1.04 (0.69, 1.44) | 0.82131 |
| END | Logistic | Covariate | prior.apltYES | 0.20 (0.00, 2.31) | 0.28122 |
| END | Logistic | Covariate | prior.strokeYES | 4.82 (0.27, 75.15) | 0.25013 |
| END | Logistic | Covariate | sexMale | 0.18 (0.02, 1.30) | 0.09546 |
| END | Logistic | Primary | adp_d1 | 1.02 (0.98, 1.07) | 0.25950 |
| adp_d1_htpr | END | Logistic | Covariate | age | 1.07 (0.98, 1.19) | 0.13569 |
| END | Logistic | Covariate | daptYES | 0.10 (0.00, 2.87) | 0.12163 |
| END | Logistic | Covariate | initial.nihss | 1.03 (0.65, 1.45) | 0.88066 |
| END | Logistic | Covariate | prior.apltYES | 0.22 (0.01, 2.77) | 0.30960 |
| END | Logistic | Covariate | prior.strokeYES | 7.45 (0.38, 164.52) | 0.17300 |
| END | Logistic | Covariate | sexMale | 0.11 (0.01, 0.96) | 0.06272 |
| END | Logistic | Primary | adp_htpr_d1_>46U | 10.15 (1.06, 326.58) | 0.09180 |
| adp_d1d3_changes | END | Logistic (Firth) | Covariate | age | 1.03 (-0.04, 0.13) | 0.34044 |
| END | Logistic (Firth) | Covariate | daptYES | 0.27 (-4.58, 7.10) | 0.52919 |
| END | Logistic (Firth) | Covariate | initial.nihss | 1.05 (-0.35, 0.60) | 0.77199 |
| END | Logistic (Firth) | Covariate | prior.apltYES | 0.77 (-3.22, 1.91) | 0.82677 |
| END | Logistic (Firth) | Covariate | prior.strokeYES | 3.59 (-1.19, 3.78) | 0.29027 |
| END | Logistic (Firth) | Covariate | sexMale | 0.42 (-2.80, 1.03) | 0.34880 |
| END | Logistic (Firth) | Primary | adp_htpr_chgd1 <=46, d3 >46 | 3.77 (-3.95, 6.36) | 0.52326 |
| END | Logistic (Firth) | Primary | adp_htpr_chgd1 > 46, d3 <=46 | 6.71 (-0.46, 6.59) | 0.12008 |
| END | Logistic (Firth) | Primary | adp_htpr_chgd1 and d3 > 46 | 5.65 (-0.66, 6.44) | 0.16307 |
| adp_d3 | END | Logistic | Covariate | age | 1.04 (0.96, 1.13) | 0.30180 |
| END | Logistic | Covariate | daptYES | 1.27 (0.02, 6707.34) | 0.93102 |
| END | Logistic | Covariate | initial.nihss | 1.20 (0.77, 2.23) | 0.42993 |
| END | Logistic | Covariate | prior.apltYES | 0.25 (0.01, 3.03) | 0.35697 |
| END | Logistic | Covariate | prior.strokeYES | 5.55 (0.34, 75.38) | 0.19154 |
| END | Logistic | Covariate | sexMale | 0.35 (0.04, 3.31) | 0.33158 |
| END | Logistic | Primary | adp_d3 | 1.01 (0.96, 1.06) | 0.56685 |
| adp_d3_htpr | END | Logistic | Covariate | age | 1.04 (0.96, 1.13) | 0.30356 |
| END | Logistic | Covariate | daptYES | 1.33 (0.02, 6963.63) | 0.92034 |
| END | Logistic | Covariate | initial.nihss | 1.22 (0.79, 2.29) | 0.38175 |
| END | Logistic | Covariate | prior.apltYES | 0.27 (0.01, 2.95) | 0.34341 |
| END | Logistic | Covariate | prior.strokeYES | 5.95 (0.47, 74.20) | 0.15279 |
| END | Logistic | Covariate | sexMale | 0.35 (0.04, 3.23) | 0.32367 |
| END | Logistic | Primary | adp_htpr_d3_>46U | 2.16 (0.23, 19.88) | 0.47356 |
| aspi_d1 | END | Logistic | Covariate | age | 1.02 (0.98, 1.07) | 0.27476 |
| END | Logistic | Covariate | daptYES | 0.31 (0.07, 1.16) | 0.09184 |
| END | Logistic | Covariate | initial.nihss | 1.02 (0.92, 1.13) | 0.63639 |
| END | Logistic | Covariate | prior.apltYES | 1.19 (0.21, 4.90) | 0.82380 |
| END | Logistic | Covariate | prior.strokeYES | 1.08 (0.13, 5.77) | 0.93087 |
| END | Logistic | Covariate | sexMale | 0.68 (0.23, 2.00) | 0.47009 |
| END | Logistic | Primary | aspi_d1 | 0.95 (0.89, 1.00) | 0.10012 |
| aspi_d1_htpr | END | Logistic | Covariate | age | 1.03 (0.99, 1.07) | 0.20963 |
| END | Logistic | Covariate | daptYES | 0.29 (0.07, 1.09) | 0.07528 |
| END | Logistic | Covariate | initial.nihss | 1.01 (0.91, 1.11) | 0.81518 |
| END | Logistic | Covariate | prior.apltYES | 1.09 (0.19, 4.56) | 0.91008 |
| END | Logistic | Covariate | prior.strokeYES | 1.11 (0.13, 5.92) | 0.91407 |
| END | Logistic | Covariate | sexMale | 0.62 (0.22, 1.80) | 0.36550 |
| END | Logistic | Primary | aspi_htpr_d1_>30U | 0.20 (0.01, 1.07) | 0.12904 |
| aspi_d1d3_changes | END | Logistic (Firth) | Covariate | age | 1.05 (0.00, 0.10) | 0.03763 |
| END | Logistic (Firth) | Covariate | daptYES | 0.56 (-2.08, 0.92) | 0.44507 |
| END | Logistic (Firth) | Covariate | initial.nihss | 1.11 (-0.02, 0.23) | 0.09129 |
| END | Logistic (Firth) | Covariate | prior.apltYES | 0.89 (-1.98, 1.46) | 0.88932 |
| END | Logistic (Firth) | Covariate | prior.strokeYES | 1.67 (-1.33, 2.04) | 0.55011 |
| END | Logistic (Firth) | Covariate | sexMale | 0.55 (-1.74, 0.54) | 0.29772 |
| END | Logistic (Firth) | Primary | aspi_htpr_chgd1 <30, d3 >30 | 0.12 (-7.40, 0.81) | 0.18745 |
| END | Logistic (Firth) | Primary | aspi_htpr_chgd1 >30, d3 <=30 | 0.28 (-3.57, 0.28) | 0.11723 |
| END | Logistic (Firth) | Primary | aspi_htpr_chgd1 and d3 >30 | 0.84 (-5.18, 2.57) | 0.91445 |
| aspi_d3 | END | Logistic | Covariate | age | 1.03 (0.99, 1.08) | 0.15649 |
| END | Logistic | Covariate | daptYES | 0.35 (0.08, 1.44) | 0.15291 |
| END | Logistic | Covariate | initial.nihss | 1.10 (0.98, 1.23) | 0.10716 |
| END | Logistic | Covariate | prior.apltYES | 1.47 (0.28, 6.15) | 0.61631 |
| END | Logistic | Covariate | prior.strokeYES | 1.55 (0.20, 7.87) | 0.62736 |
| END | Logistic | Covariate | sexMale | 0.73 (0.24, 2.32) | 0.57842 |
| END | Logistic | Primary | aspi_d3 | 0.93 (0.84, 1.01) | 0.09689 |
| aspi_d3_htpr | END | Logistic (Firth) | Covariate | age | 1.04 (-0.00, 0.09) | 0.05953 |
| END | Logistic (Firth) | Covariate | daptYES | 0.52 (-2.11, 0.77) | 0.36320 |
| END | Logistic (Firth) | Covariate | initial.nihss | 1.10 (-0.02, 0.21) | 0.10466 |
| END | Logistic (Firth) | Covariate | prior.apltYES | 1.03 (-1.81, 1.57) | 0.96908 |
| END | Logistic (Firth) | Covariate | prior.strokeYES | 1.62 (-1.35, 2.02) | 0.57052 |
| END | Logistic (Firth) | Covariate | sexMale | 0.58 (-1.66, 0.57) | 0.32740 |
| END | Logistic (Firth) | Primary | aspi_htpr_d3_>30U | 0.17 (-6.91, 0.81) | 0.21442 |
| adp_d1 | Stroke | Cox | Covariate | age | 0.97 (0.92, 1.02) | 0.24918 |
| Stroke | Cox | Covariate | daptYES | 0.83 (0.08, 9.03) | 0.87947 |
| Stroke | Cox | Covariate | initial.nihss | 0.84 (0.53, 1.33) | 0.46346 |
| Stroke | Cox | Covariate | prior.apltYES | 1.86 (0.39, 8.91) | 0.44011 |
| Stroke | Cox | Covariate | prior.strokeYES | 1.86 (0.35, 9.76) | 0.46506 |
| Stroke | Cox | Covariate | sexMale | 0.89 (0.25, 3.24) | 0.86243 |
| Stroke | Cox | Primary | adp_d1 | 1.01 (0.99, 1.04) | 0.27289 |
| adp_d1_htpr | Stroke | Cox | Covariate | age | 0.97 (0.92, 1.02) | 0.28271 |
| Stroke | Cox | Covariate | daptYES | 0.81 (0.07, 8.96) | 0.86465 |
| Stroke | Cox | Covariate | initial.nihss | 0.86 (0.55, 1.33) | 0.49347 |
| Stroke | Cox | Covariate | prior.apltYES | 1.97 (0.42, 9.23) | 0.38695 |
| Stroke | Cox | Covariate | prior.strokeYES | 2.03 (0.41, 10.19) | 0.38722 |
| Stroke | Cox | Covariate | sexMale | 0.80 (0.22, 2.87) | 0.73482 |
| Stroke | Cox | Primary | adp_htpr_d1_>46U | 1.93 (0.53, 7.01) | 0.31538 |
| adp_d1d3_changes | Stroke | Cox | Covariate | age | 0.98 (0.93, 1.04) | 0.53704 |
| Stroke | Cox | Covariate | daptYES | 0.25 (0.02, 3.88) | 0.31974 |
| Stroke | Cox | Covariate | initial.nihss | 0.80 (0.51, 1.25) | 0.32518 |
| Stroke | Cox | Covariate | prior.apltYES | 1.27 (0.24, 6.57) | 0.77881 |
| Stroke | Cox | Covariate | prior.strokeYES | 2.52 (0.45, 14.08) | 0.29288 |
| Stroke | Cox | Covariate | sexMale | 0.72 (0.19, 2.75) | 0.62721 |
| Stroke | Cox | Primary | adp_htpr_chgd1 <=46, d3 >46 | 6.28 (0.73, 53.94) | 0.09383 |
| Stroke | Cox | Primary | adp_htpr_chgd1 > 46, d3 <=46 | 4.28 (0.73, 25.26) | 0.10798 |
| Stroke | Cox | Primary | adp_htpr_chgd1 and d3 > 46 | 1.98 (0.26, 15.36) | 0.51140 |
| adp_d3 | Stroke | Cox | Covariate | age | 0.96 (0.91, 1.02) | 0.17242 |
| Stroke | Cox | Covariate | daptYES | 0.68 (0.07, 7.18) | 0.75137 |
| Stroke | Cox | Covariate | initial.nihss | 0.84 (0.53, 1.33) | 0.45532 |
| Stroke | Cox | Covariate | prior.apltYES | 1.49 (0.29, 7.72) | 0.63509 |
| Stroke | Cox | Covariate | prior.strokeYES | 1.68 (0.29, 9.71) | 0.56265 |
| Stroke | Cox | Covariate | sexMale | 0.93 (0.25, 3.54) | 0.92039 |
| Stroke | Cox | Primary | adp_d3 | 1.02 (0.99, 1.05) | 0.11100 |
| adp_d3_htpr | Stroke | Cox | Covariate | age | 0.97 (0.92, 1.02) | 0.28069 |
| Stroke | Cox | Covariate | daptYES | 0.63 (0.05, 7.48) | 0.71785 |
| Stroke | Cox | Covariate | initial.nihss | 0.85 (0.55, 1.32) | 0.47651 |
| Stroke | Cox | Covariate | prior.apltYES | 1.53 (0.32, 7.25) | 0.59349 |
| Stroke | Cox | Covariate | prior.strokeYES | 1.97 (0.38, 10.11) | 0.41819 |
| Stroke | Cox | Covariate | sexMale | 0.82 (0.22, 3.02) | 0.76231 |
| Stroke | Cox | Primary | adp_htpr_d3_>46U | 1.48 (0.40, 5.48) | 0.55527 |
| aspi_d1 | Stroke | Cox | Covariate | age | 1.00 (0.96, 1.04) | 0.82884 |
| Stroke | Cox | Covariate | daptYES | 1.42 (0.44, 4.64) | 0.56073 |
| Stroke | Cox | Covariate | initial.nihss | 0.99 (0.89, 1.11) | 0.92170 |
| Stroke | Cox | Covariate | prior.apltYES | 1.39 (0.39, 5.04) | 0.61210 |
| Stroke | Cox | Covariate | prior.strokeYES | 1.63 (0.38, 6.89) | 0.50986 |
| Stroke | Cox | Covariate | sexMale | 0.79 (0.29, 2.11) | 0.63211 |
| Stroke | Cox | Primary | aspi_d1 | 1.01 (0.99, 1.04) | 0.25556 |
| aspi_d1_htpr | Stroke | Cox | Covariate | age | 0.99 (0.96, 1.03) | 0.75482 |
| Stroke | Cox | Covariate | daptYES | 1.46 (0.45, 4.77) | 0.53026 |
| Stroke | Cox | Covariate | initial.nihss | 1.00 (0.89, 1.12) | 0.93751 |
| Stroke | Cox | Covariate | prior.apltYES | 1.34 (0.38, 4.78) | 0.64807 |
| Stroke | Cox | Covariate | prior.strokeYES | 1.63 (0.39, 6.81) | 0.50595 |
| Stroke | Cox | Covariate | sexMale | 0.76 (0.28, 2.02) | 0.57679 |
| Stroke | Cox | Primary | aspi_htpr_d1_>30U | 1.48 (0.48, 4.63) | 0.49625 |
| aspi_d1d3_changes | Stroke | Cox (Firth) | Covariate | age | 1.00 (0.96, 1.04) | 0.88173 |
| Stroke | Cox (Firth) | Covariate | daptYES | 1.75 (0.53, 6.51) | 0.37000 |
| Stroke | Cox (Firth) | Covariate | initial.nihss | 1.04 (0.89, 1.18) | NA |
| Stroke | Cox (Firth) | Covariate | prior.apltYES | 1.57 (0.41, 4.91) | 0.48427 |
| Stroke | Cox (Firth) | Covariate | prior.strokeYES | 1.68 (0.39, 5.89) | 0.45713 |
| Stroke | Cox (Firth) | Covariate | sexMale | 0.70 (0.26, 1.94) | 0.48569 |
| Stroke | Cox (Firth) | Primary | aspi_htpr_chgd1 <30, d3 >30 | 0.79 (0.01, 6.57) | 0.87079 |
| Stroke | Cox (Firth) | Primary | aspi_htpr_chgd1 >30, d3 <=30 | 1.20 (0.30, 3.63) | 0.76798 |
| Stroke | Cox (Firth) | Primary | aspi_htpr_chgd1 and d3 >30 | 6.20 (0.62, 32.08) | 0.10379 |
| aspi_d3 | Stroke | Cox | Covariate | age | 1.00 (0.96, 1.04) | 0.87902 |
| Stroke | Cox | Covariate | daptYES | 1.62 (0.46, 5.63) | 0.44992 |
| Stroke | Cox | Covariate | initial.nihss | 1.02 (0.89, 1.17) | 0.74067 |
| Stroke | Cox | Covariate | prior.apltYES | 1.50 (0.42, 5.34) | 0.53238 |
| Stroke | Cox | Covariate | prior.strokeYES | 1.56 (0.39, 6.29) | 0.53254 |
| Stroke | Cox | Covariate | sexMale | 0.69 (0.25, 1.90) | 0.46837 |
| Stroke | Cox | Primary | aspi_d3 | 1.01 (0.96, 1.06) | 0.63920 |
| aspi_d3_htpr | Stroke | Cox | Covariate | age | 1.00 (0.96, 1.04) | 0.86662 |
| Stroke | Cox | Covariate | daptYES | 1.58 (0.46, 5.46) | 0.46912 |
| Stroke | Cox | Covariate | initial.nihss | 1.03 (0.89, 1.18) | 0.72287 |
| Stroke | Cox | Covariate | prior.apltYES | 1.47 (0.42, 5.22) | 0.54773 |
| Stroke | Cox | Covariate | prior.strokeYES | 1.57 (0.39, 6.32) | 0.52754 |
| Stroke | Cox | Covariate | sexMale | 0.71 (0.26, 1.96) | 0.51061 |
| Stroke | Cox | Primary | aspi_htpr_d3_>30U | 1.21 (0.15, 9.89) | 0.85892 |
| adp_d1 | mRS2 | Logistic | Covariate | age | 1.08 (0.97, 1.27) | 0.23055 |
| mRS2 | Logistic | Covariate | daptYES | 3.79 (0.03, 276164.93) | 0.73429 |
| mRS2 | Logistic | Covariate | initial.nihss | 1.53 (1.03, 3.65) | 0.15540 |
| mRS2 | Logistic | Covariate | prior.apltYES | 1.06 (0.04, 16.65) | 0.96777 |
| mRS2 | Logistic | Covariate | prior.strokeYES | 3.31 (0.19, 61.10) | 0.39956 |
| mRS2 | Logistic | Covariate | sexMale | 1.58 (0.08, 90.85) | 0.78408 |
| mRS2 | Logistic | Primary | adp_d1 | 1.05 (1.01, 1.10) | 0.03744 |
| adp_d1_htpr | mRS2 | Logistic (Firth) | Covariate | age | 1.05 (-0.03, 0.20) | 0.25456 |
| mRS2 | Logistic (Firth) | Covariate | daptYES | 0.42 (-4.25, 7.18) | 0.67284 |
| mRS2 | Logistic (Firth) | Covariate | initial.nihss | 1.24 (-0.04, 0.79) | 0.10716 |
| mRS2 | Logistic (Firth) | Covariate | prior.apltYES | 3.44 (-1.56, 3.94) | 0.36558 |
| mRS2 | Logistic (Firth) | Covariate | prior.strokeYES | 2.48 (-1.60, 3.46) | 0.45754 |
| mRS2 | Logistic (Firth) | Covariate | sexMale | 0.91 (-2.48, 2.54) | 0.93732 |
| mRS2 | Logistic (Firth) | Primary | adp_htpr_d1_>46U | 20.99 (0.43, 8.87) | 0.01674 |
| adp_d1d3_changes | mRS2 | Logistic (Firth) | Covariate | age | 1.03 (-0.06, 0.15) | 0.47501 |
| mRS2 | Logistic (Firth) | Covariate | daptYES | 0.49 (-4.43, 6.57) | 0.72642 |
| mRS2 | Logistic (Firth) | Covariate | initial.nihss | 1.28 (-0.04, 0.79) | 0.09014 |
| mRS2 | Logistic (Firth) | Covariate | prior.apltYES | 3.06 (-1.36, 3.78) | 0.35713 |
| mRS2 | Logistic (Firth) | Covariate | prior.strokeYES | 1.84 (-1.96, 2.93) | 0.60269 |
| mRS2 | Logistic (Firth) | Covariate | sexMale | 0.93 (-2.48, 2.73) | 0.95261 |
| mRS2 | Logistic (Firth) | Primary | adp_htpr_chgd1 <=46, d3 >46 | 17.25 (-2.72, 9.48) | 0.25506 |
| mRS2 | Logistic (Firth) | Primary | adp_htpr_chgd1 > 46, d3 <=46 | 9.70 (-1.51, 8.23) | 0.23648 |
| mRS2 | Logistic (Firth) | Primary | adp_htpr_chgd1 and d3 > 46 | 45.25 (0.85, 9.99) | 0.00668 |
| adp_d3 | mRS2 | Logistic | Covariate | age | 1.07 (0.97, 1.22) | 0.22499 |
| mRS2 | Logistic | Covariate | daptYES | 8.04 (0.06, 273005.57) | 0.58444 |
| mRS2 | Logistic | Covariate | initial.nihss | 1.65 (1.08, 3.92) | 0.09944 |
| mRS2 | Logistic | Covariate | prior.apltYES | 1.41 (0.07, 17.70) | 0.79669 |
| mRS2 | Logistic | Covariate | prior.strokeYES | 1.54 (0.07, 31.39) | 0.77595 |
| mRS2 | Logistic | Covariate | sexMale | 1.87 (0.11, 129.65) | 0.70692 |
| mRS2 | Logistic | Primary | adp_d3 | 1.05 (1.00, 1.11) | 0.08911 |
| adp_d3_htpr | mRS2 | Logistic (Firth) | Covariate | age | 1.04 (-0.04, 0.13) | 0.32580 |
| mRS2 | Logistic (Firth) | Covariate | daptYES | 0.73 (-3.57, 7.67) | 0.87666 |
| mRS2 | Logistic (Firth) | Covariate | initial.nihss | 1.39 (0.05, 0.96) | 0.02212 |
| mRS2 | Logistic (Firth) | Covariate | prior.apltYES | 1.57 (-1.71, 2.39) | 0.65357 |
| mRS2 | Logistic (Firth) | Covariate | prior.strokeYES | 2.74 (-1.06, 3.24) | 0.33350 |
| mRS2 | Logistic (Firth) | Covariate | sexMale | 1.03 (-2.21, 2.66) | 0.97663 |
| mRS2 | Logistic (Firth) | Primary | adp_htpr_d3_>46U | 16.58 (0.45, 10.10) | 0.01669 |
| aspi_d1 | mRS2 | Logistic | Covariate | age | 1.07 (1.03, 1.13) | 0.00251 |
| mRS2 | Logistic | Covariate | daptYES | 0.15 (0.03, 0.63) | 0.01483 |
| mRS2 | Logistic | Covariate | initial.nihss | 1.28 (1.14, 1.46) | < 0.001 |
| mRS2 | Logistic | Covariate | prior.apltYES | 7.85 (1.72, 40.87) | 0.00937 |
| mRS2 | Logistic | Covariate | prior.strokeYES | 0.50 (0.08, 2.50) | 0.42239 |
| mRS2 | Logistic | Covariate | sexMale | 0.39 (0.13, 1.13) | 0.08412 |
| mRS2 | Logistic | Primary | aspi_d1 | 1.02 (0.98, 1.05) | 0.28134 |
| aspi_d1_htpr | mRS2 | Logistic | Covariate | age | 1.07 (1.03, 1.13) | 0.00292 |
| mRS2 | Logistic | Covariate | daptYES | 0.16 (0.03, 0.67) | 0.01803 |
| mRS2 | Logistic | Covariate | initial.nihss | 1.28 (1.14, 1.46) | < 0.001 |
| mRS2 | Logistic | Covariate | prior.apltYES | 7.51 (1.66, 38.96) | 0.01074 |
| mRS2 | Logistic | Covariate | prior.strokeYES | 0.50 (0.08, 2.48) | 0.42234 |
| mRS2 | Logistic | Covariate | sexMale | 0.41 (0.14, 1.19) | 0.10463 |
| mRS2 | Logistic | Primary | aspi_htpr_d1_>30U | 1.25 (0.38, 3.97) | 0.70680 |
| aspi_d1d3_changes | mRS2 | Logistic (Firth) | Covariate | age | 1.07 (0.03, 0.12) | 0.00122 |
| mRS2 | Logistic (Firth) | Covariate | daptYES | 0.19 (-3.16, -0.35) | 0.01237 |
| mRS2 | Logistic (Firth) | Covariate | initial.nihss | 1.23 (0.10, 0.32) | < 0.001 |
| mRS2 | Logistic (Firth) | Covariate | prior.apltYES | 5.07 (0.12, 3.19) | 0.03426 |
| mRS2 | Logistic (Firth) | Covariate | prior.strokeYES | 0.64 (-2.14, 1.04) | 0.56542 |
| mRS2 | Logistic (Firth) | Covariate | sexMale | 0.46 (-1.86, 0.27) | 0.14314 |
| mRS2 | Logistic (Firth) | Primary | aspi_htpr_chgd1 <30, d3 >30 | 0.68 (-3.55, 2.17) | 0.78863 |
| mRS2 | Logistic (Firth) | Primary | aspi_htpr_chgd1 >30, d3 <=30 | 1.17 (-1.08, 1.33) | 0.79610 |
| mRS2 | Logistic (Firth) | Primary | aspi_htpr_chgd1 and d3 >30 | 0.33 (-6.13, 1.79) | 0.48613 |
| aspi_d3 | mRS2 | Logistic | Covariate | age | 1.08 (1.03, 1.14) | 0.00155 |
| mRS2 | Logistic | Covariate | daptYES | 0.18 (0.03, 0.74) | 0.02489 |
| mRS2 | Logistic | Covariate | initial.nihss | 1.26 (1.13, 1.43) | < 0.001 |
| mRS2 | Logistic | Covariate | prior.apltYES | 6.46 (1.27, 36.53) | 0.02678 |
| mRS2 | Logistic | Covariate | prior.strokeYES | 0.57 (0.09, 2.90) | 0.52244 |
| mRS2 | Logistic | Covariate | sexMale | 0.36 (0.11, 1.08) | 0.07099 |
| mRS2 | Logistic | Primary | aspi_d3 | 1.02 (0.95, 1.08) | 0.54779 |
| aspi_d3_htpr | mRS2 | Logistic | Covariate | age | 1.08 (1.03, 1.14) | 0.00153 |
| mRS2 | Logistic | Covariate | daptYES | 0.16 (0.03, 0.68) | 0.01886 |
| mRS2 | Logistic | Covariate | initial.nihss | 1.27 (1.13, 1.45) | < 0.001 |
| mRS2 | Logistic | Covariate | prior.apltYES | 6.21 (1.23, 34.28) | 0.02846 |
| mRS2 | Logistic | Covariate | prior.strokeYES | 0.54 (0.08, 2.71) | 0.47229 |
| mRS2 | Logistic | Covariate | sexMale | 0.43 (0.14, 1.30) | 0.13691 |
| mRS2 | Logistic | Primary | aspi_htpr_d3_>30U | 0.27 (0.01, 2.80) | 0.32396 |
